# Supplementary material
Source: publisher site journal article supplement (https://www.dovepress.com/article/325790)

Figure S1. Quantitative analysis of IHC was performed by ImageJ.

Figure S2. Quantitative analysis of IHC was performed by ImageJ.

Figure S3. Tumors were stained for CD19 after treatment of CpG2018B, mRNA or combo treatment.


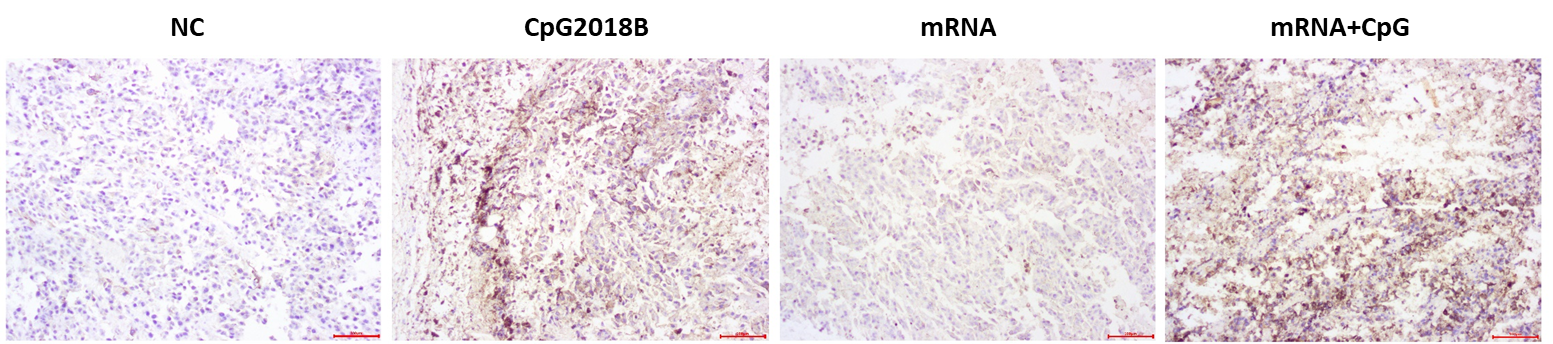

Supplement: Supplementary file 1 [file get_supplementary_file.php]
